# Supplementary material for: Efficacy of Triphala extracts on the changes of obese fecal microbiome and metabolome in the human gut model
Source: PubMed Central journal article supplement — J Tradit Complement Med. 2023 Feb 28;13(2):207–17. doi: 10.1016/j.jtcme.2023.02.011 (PMC10037071; doi:10.1016/j.jtcme.2023.02.011), 2023-02-28
Supplement: mmc1.pdf [file mmc1.pdf]

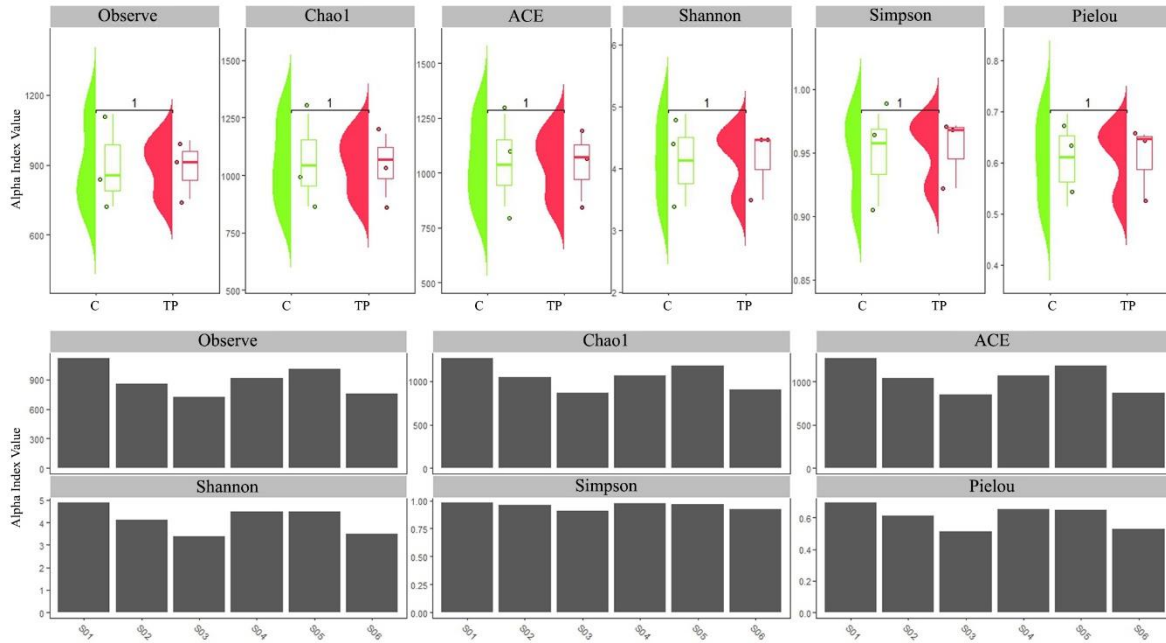

**Supplementary Fig. S1** The alpha diversity comparisons of the gut microbiome in treatment vs. control at 24 h of fermentation time in the human gut model. TP, Triphala extracts treatment; C, control group.

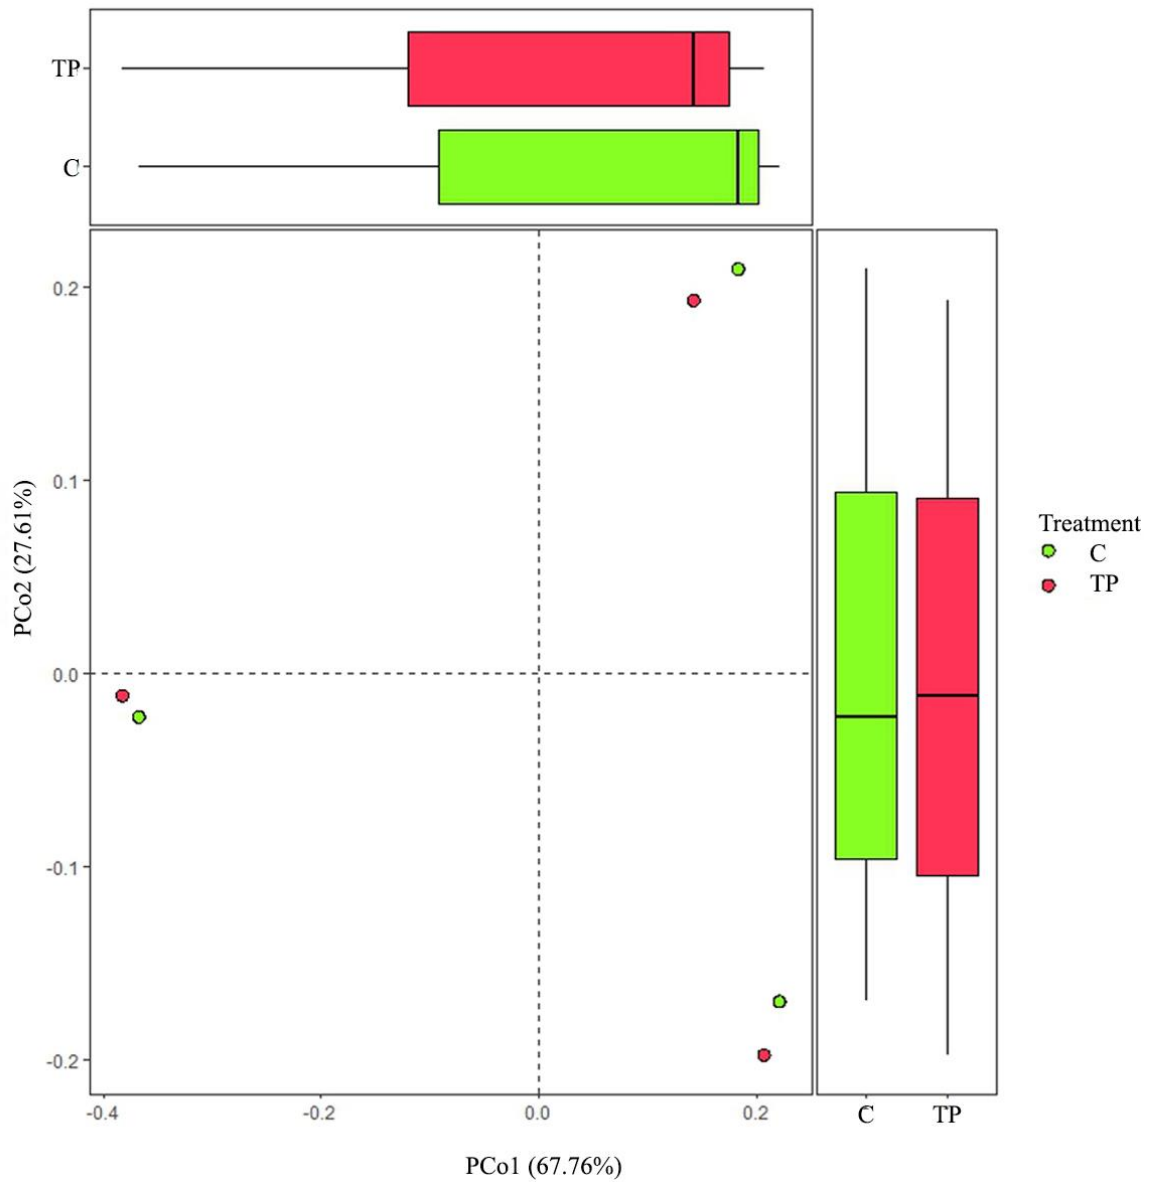

**Supplementary Fig. S2** The principal coordinate analysis (PCoA) plot of the gut microbiome data at 24 h of fermentation time in the human gut model. TP, Triphala extracts treatment; C, control group.

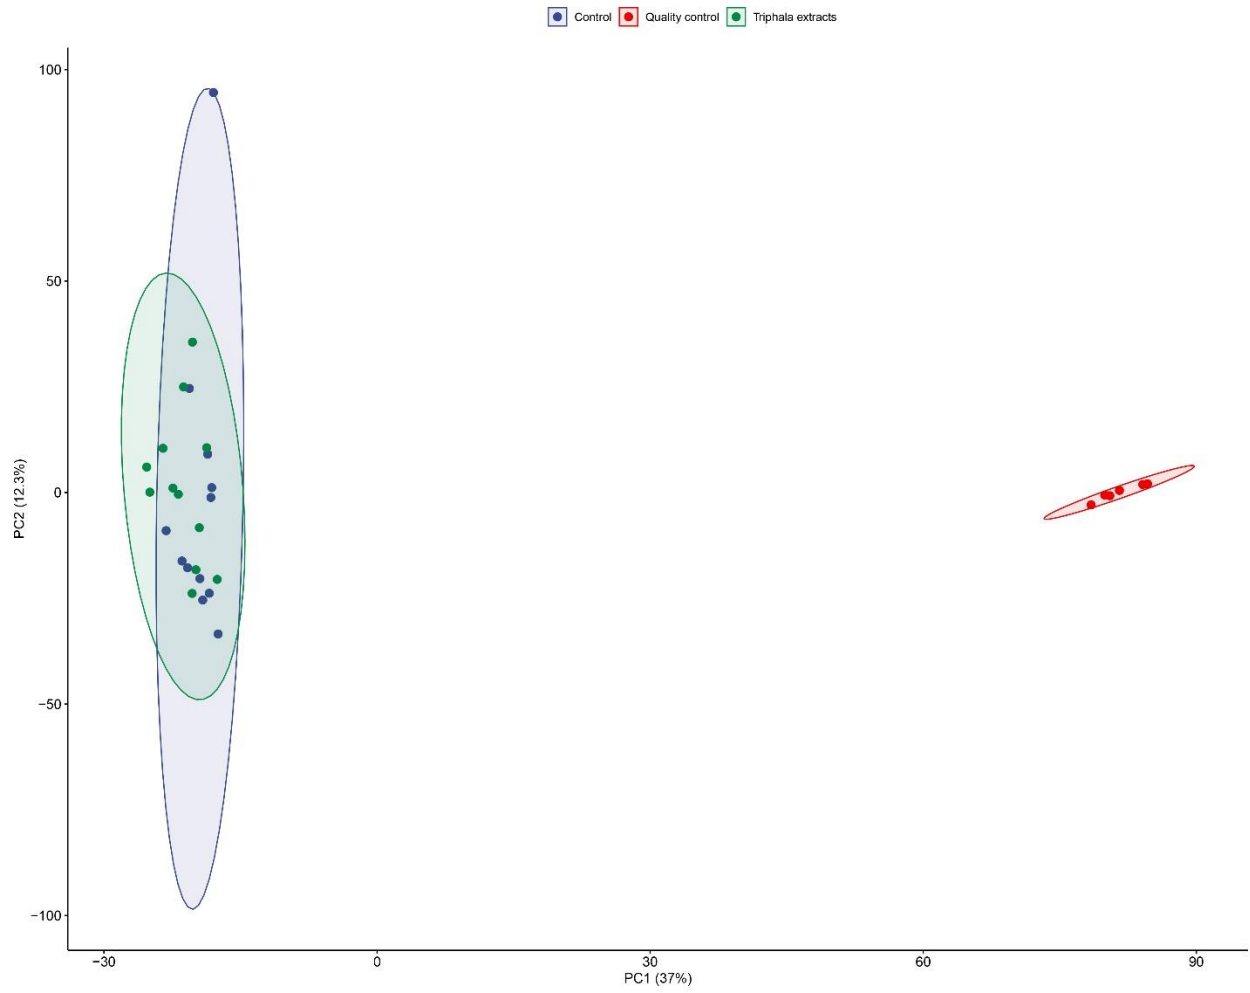

**Supplementary Fig. S3** The principal component analysis (PCA) of the metabolomic data obtained from different groups of samples including a quality control group.
